# Supplementary material for: Excessive mechanical loading promotes osteoarthritis through the gremlin-1–NF-κB pathway
Source: PubMed Central journal article supplement (PMC6441020; doi:10.1038/s41467-019-09491-5), 2019-03-29
Supplement: 41467_2019_9491_MOESM1_ESM.pdf [file 41467_2019_9491_MOESM1_ESM.pdf]

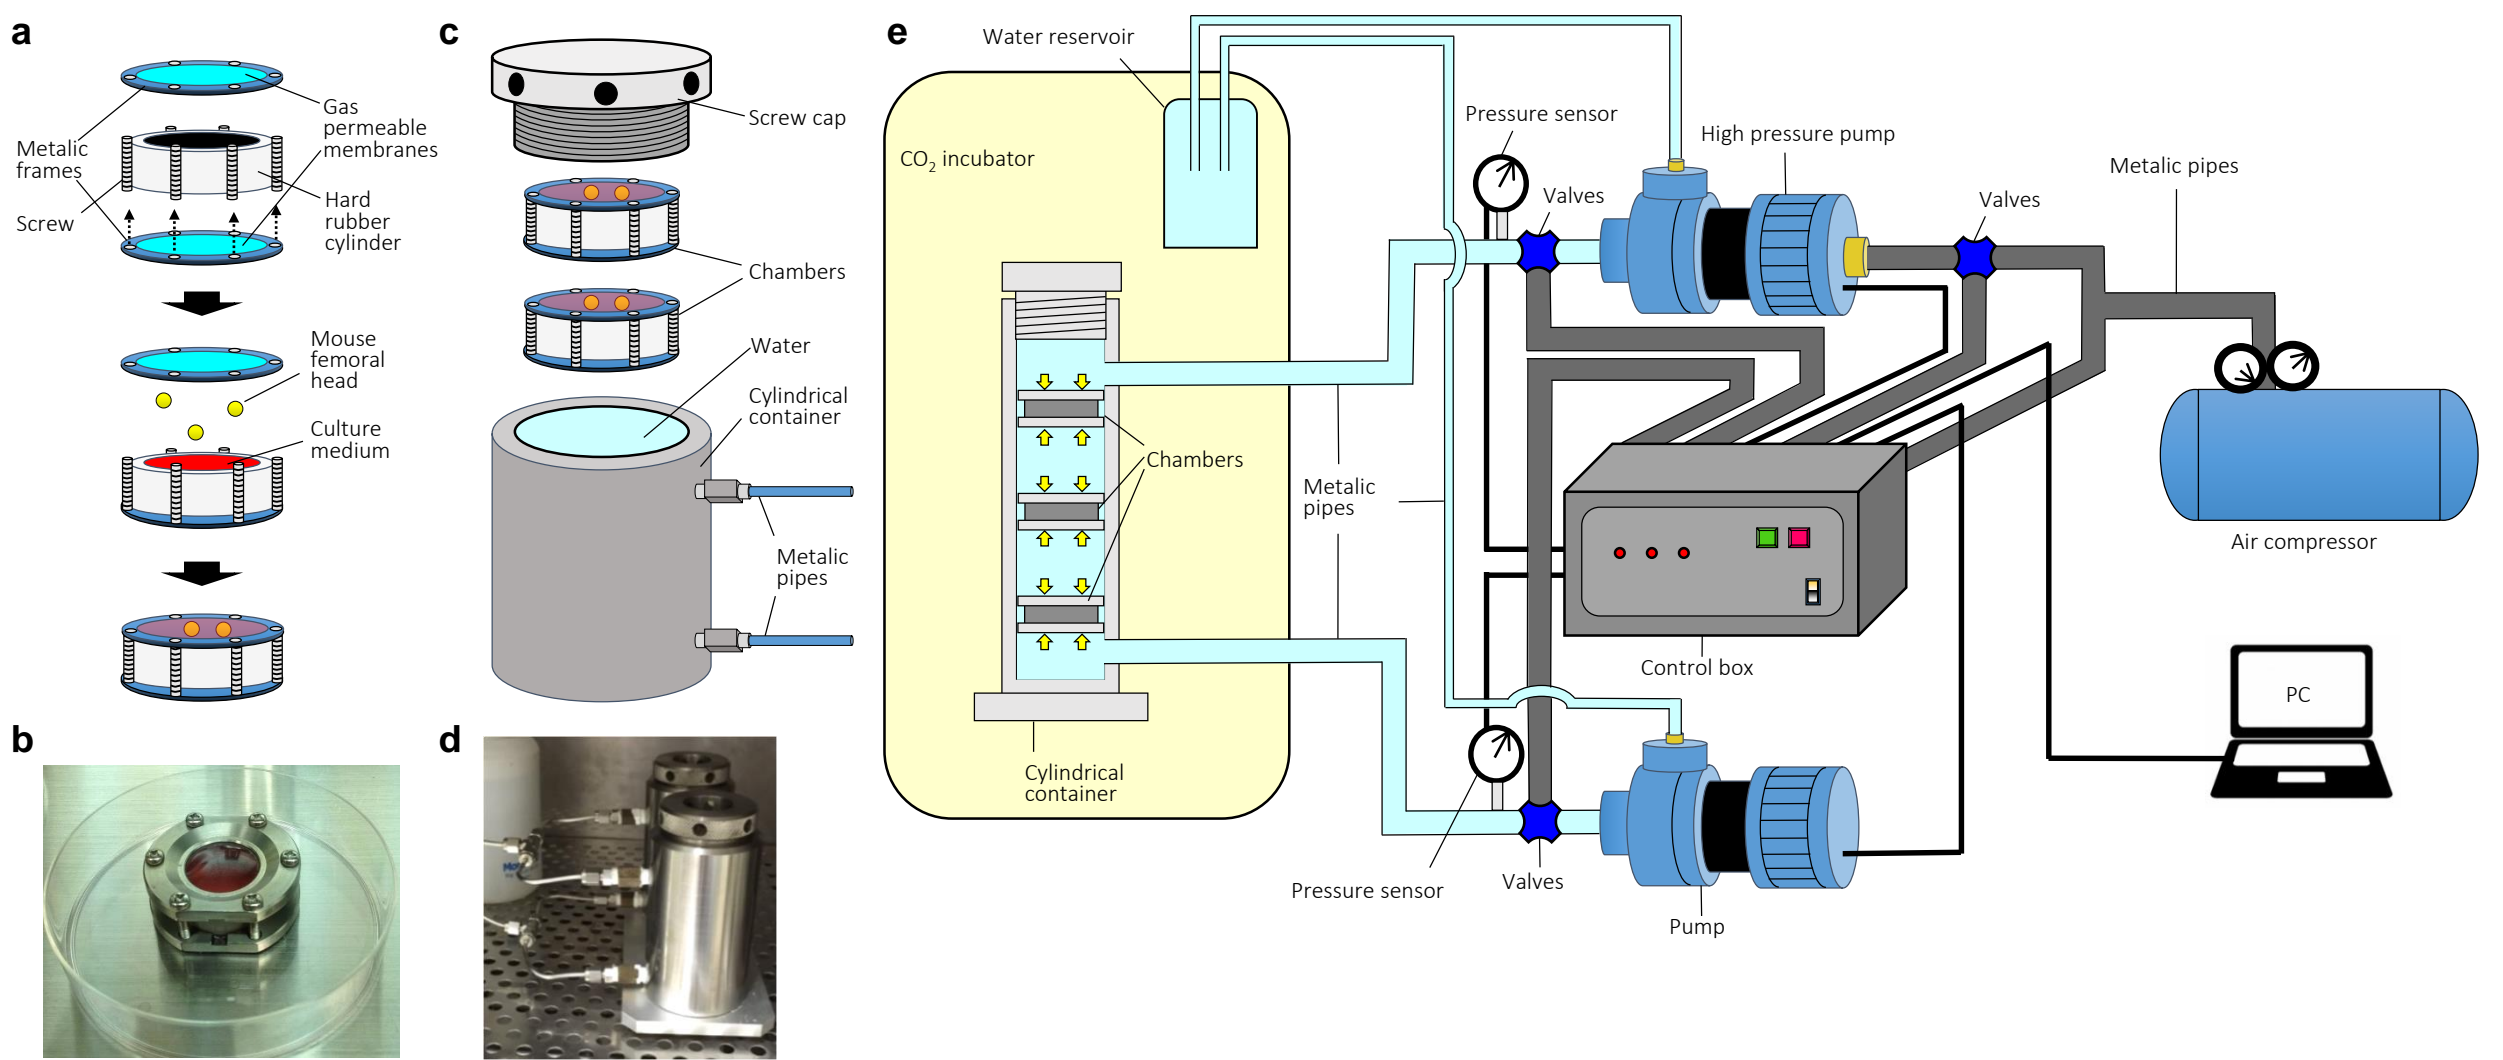

**Supplementary Figure 1** | Schematic of the procedure for the cyclic hydrostatic pressure loading on mouse femoral head explants. **(a)** The procedure of placing mouse femoral heads into a chamber. After sterilized components were set up, culture medium and mouse femoral heads were put into the chamber and sealed in an aseptic condition. **(b)** Appearance of the sealed chamber on a 10-cm dish. **(c)** The procedure of placing the chambers containing culture medium and mouse femoral heads into a cylindrical container. The container is filled with water, and tightly sealed with a screw cap to prevent air bubble intrusion. The container can contain up to 5 chambers. **(d)** Appearance of the cylindrical containers in a CO<sub>2</sub> incubator. The present system can provide hydrostatic pressure to up to 2 containers. **(e)** A simplified circuit of the system. A high-pressure pump and the cylindrical containers are connected by metallic pipes filled with water, and regulated by several valves.

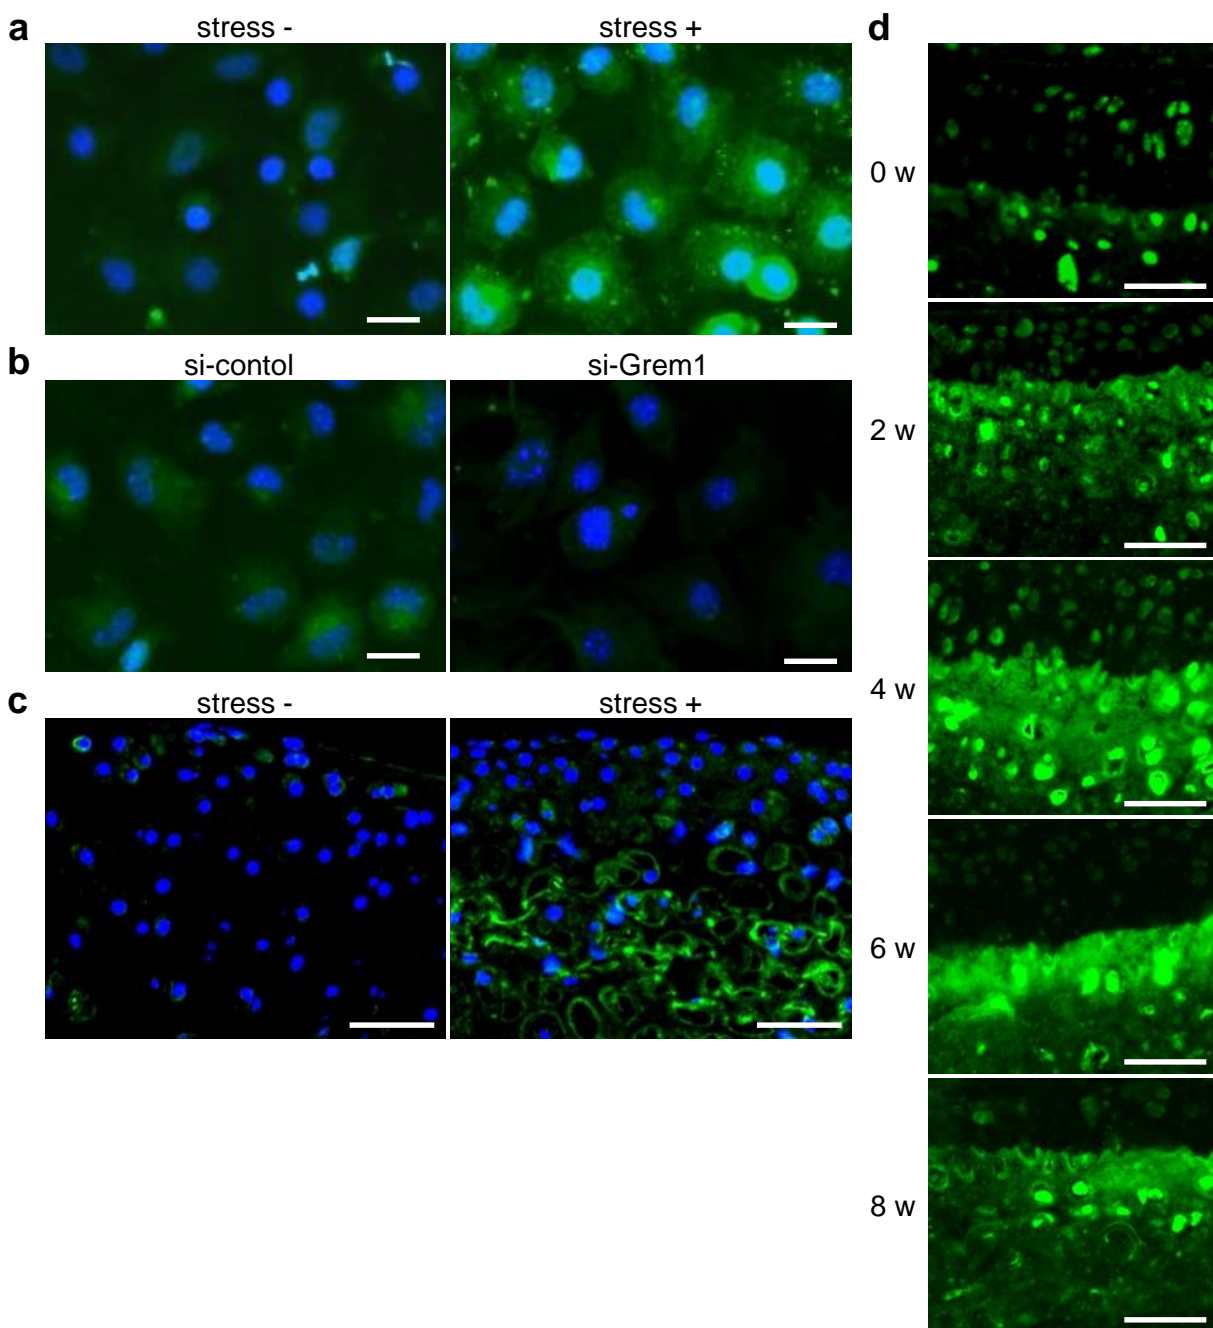

**Supplementary Figure 2** | Induction of gremlin-1 protein confirmed by an antibody from a second manufacturer (R&D Systems). **(a)** Gremlin-1 protein expression in mouse primary chondrocytes 24 hours after tensile stress loading (stress +), or without loading (stress -). Nuclei were stained with DAPI (blue). Scale bars, 50 μm. **(b)** Gremlin-1 protein expression in mouse primary chondrocytes transfected with siRNA against gremlin-1 (si-Grem1) or control (si-control). Nuclei were stained with DAPI (blue). Scale bars, 50 μm. **(c)** Gremlin-1 immunofluorescence in mouse femoral head cartilage after 20 MPa hydrostatic pressure loading. Nuclei were stained with DAPI (blue). Scale bars, 100 μm. **(d)** Gremlin-1 immunofluorescence during the time-course of mouse osteoarthritis development after surgical induction. Scale bars, 50 μm.

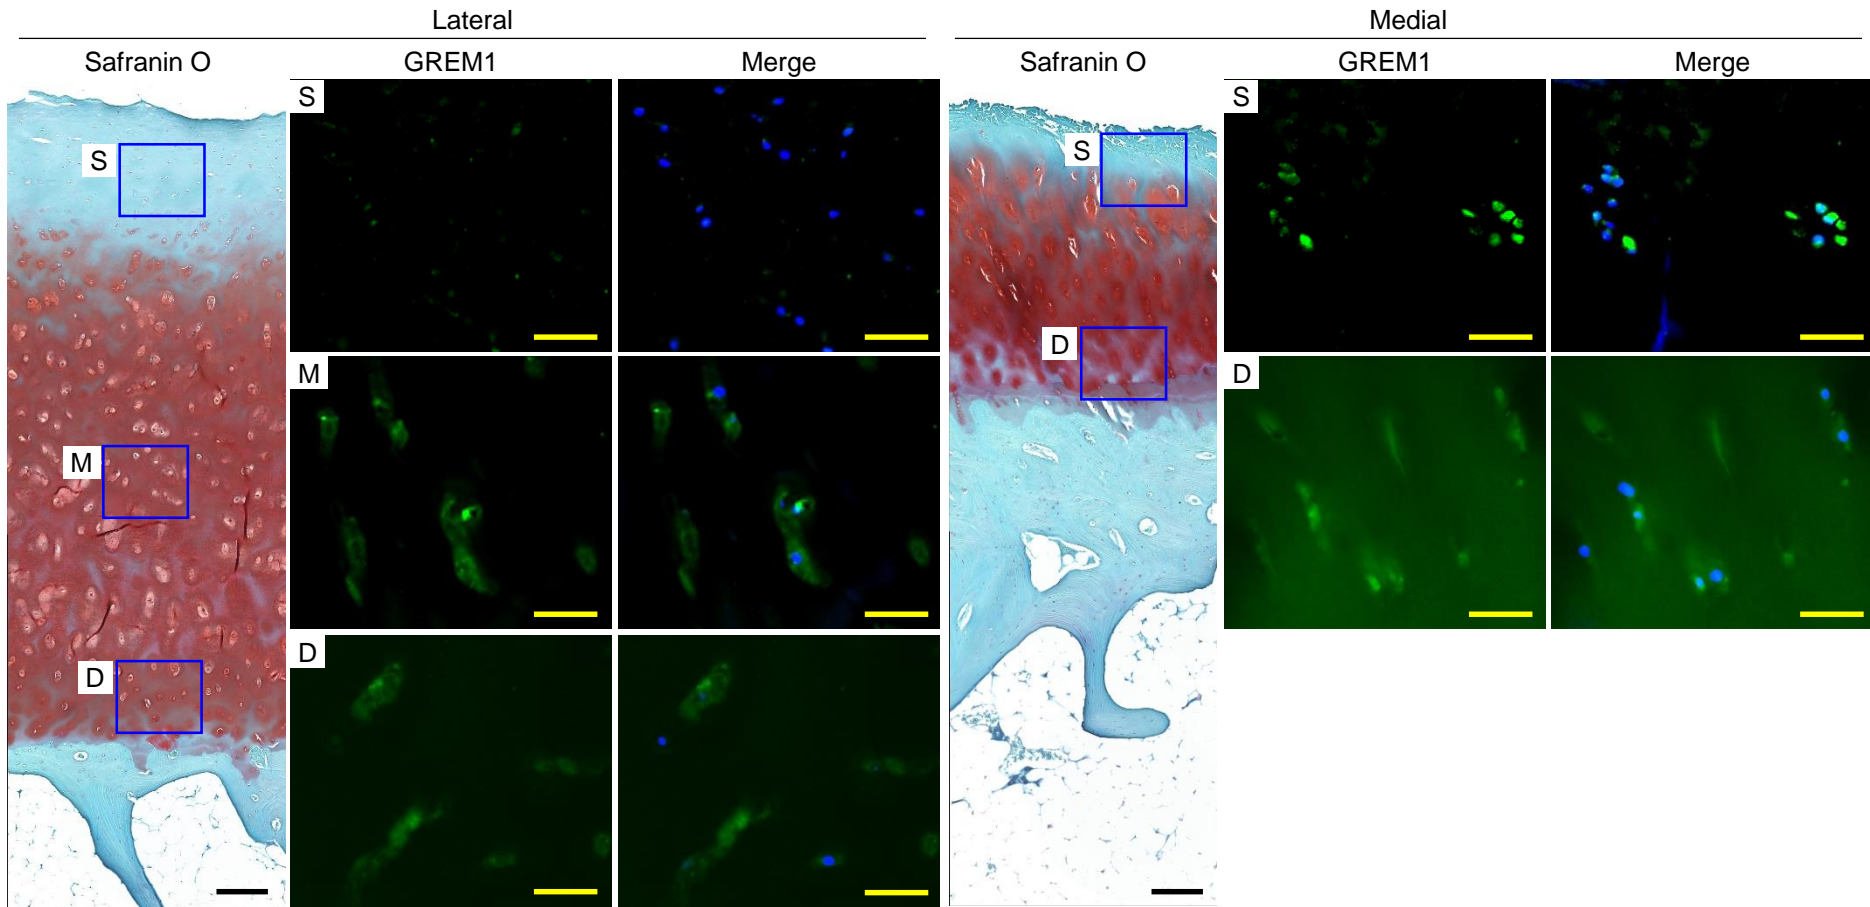

**Supplementary Figure 3** | Gremlin-1 protein expression in human tibial articular cartilage surgical specimens from total knee arthroplasty. The lateral and medial compartments display mild and severe osteoarthritic changes, respectively. Inset boxes in safranin-O stainings indicate the region shown in the enlarged immunofluorescence of GREM1. S: superficial zone, M: middle zone, D: deep zone. Scale bars, 200  $\mu\text{m}$  and 50  $\mu\text{m}$ .

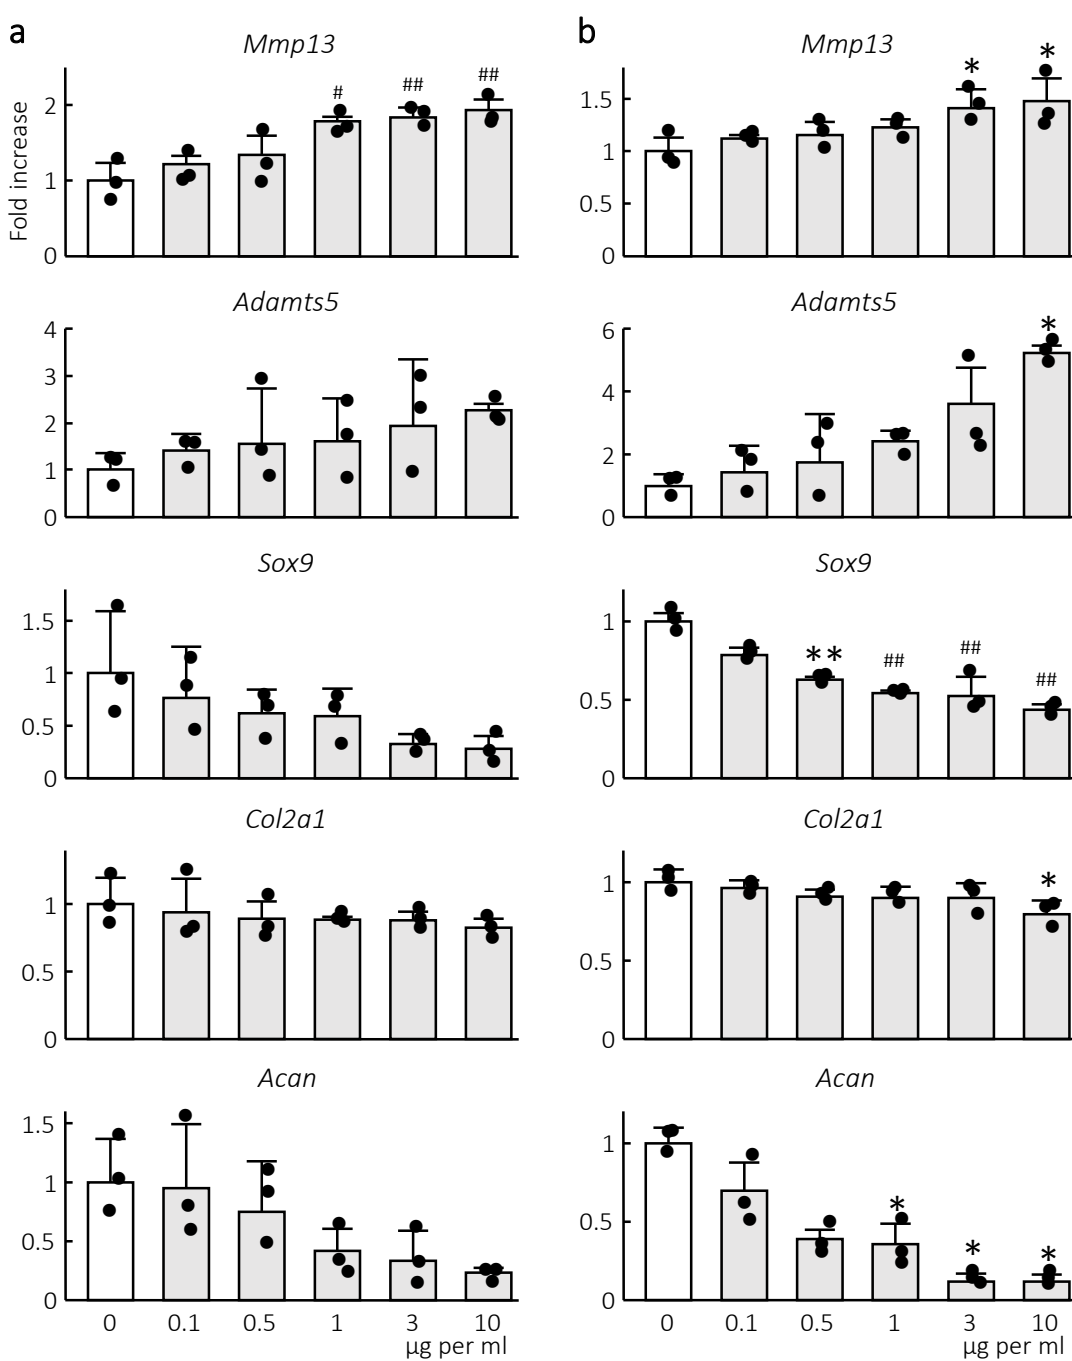

**Supplementary Figure 4** | mRNA levels of marker genes in primary mouse articular chondrocytes treated with recombinant human gremlin-1 (PeproTech) for 4 hours (**a**) and 8 hours (**b**). All error bars are expressed as means  $\pm$  SD of biologically independent three samples per group. \* $P < 0.05$ , \*\* $P < 0.01$ , # $P < 0.005$ , ## $P < 0.001$  versus 0 (vehicle) (one-way ANOVA test) .

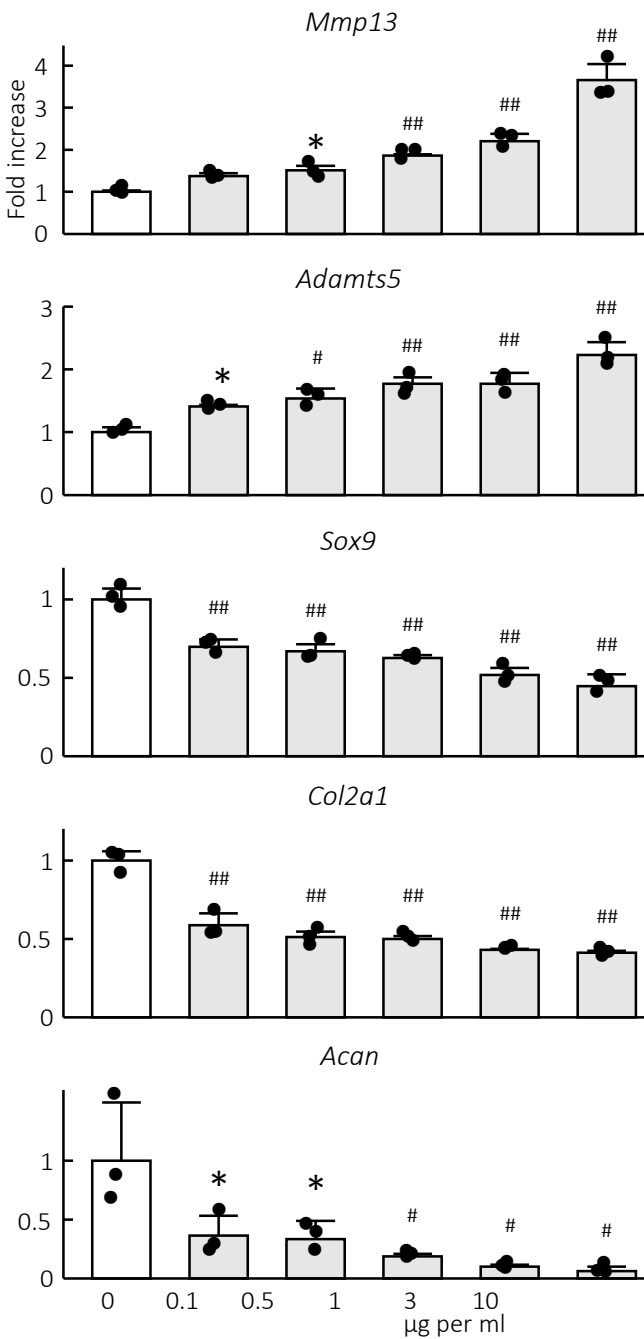

**Supplementary Figure 5** | mRNA levels of marker genes in primary mouse articular chondrocytes treated with recombinant human gremlin-1 from a second manufacturer (R&D Systems) for 24 hours. All error bars are expressed as means  $\pm$  SD of biologically independent three samples per group. \* $P < 0.05$ , \*\* $P < 0.01$ , # $P < 0.005$ , ## $P < 0.001$  versus 0 (vehicle) (one-way ANOVA test) .

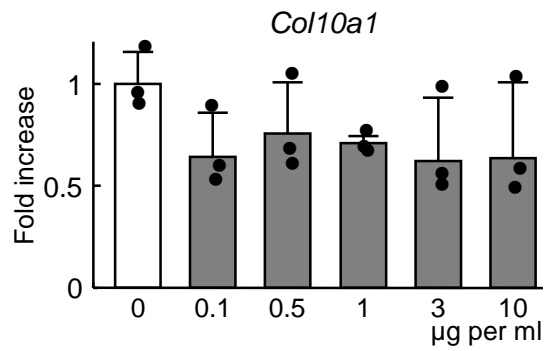

**Supplementary Figure 6** | mRNA levels of *Col10a1* in mouse primary chondrocytes treated with recombinant human gremlin-1 for 48 hours. All error bars are expressed as means  $\pm$  SD of biologically independent three samples per group (one-way ANOVA test) .

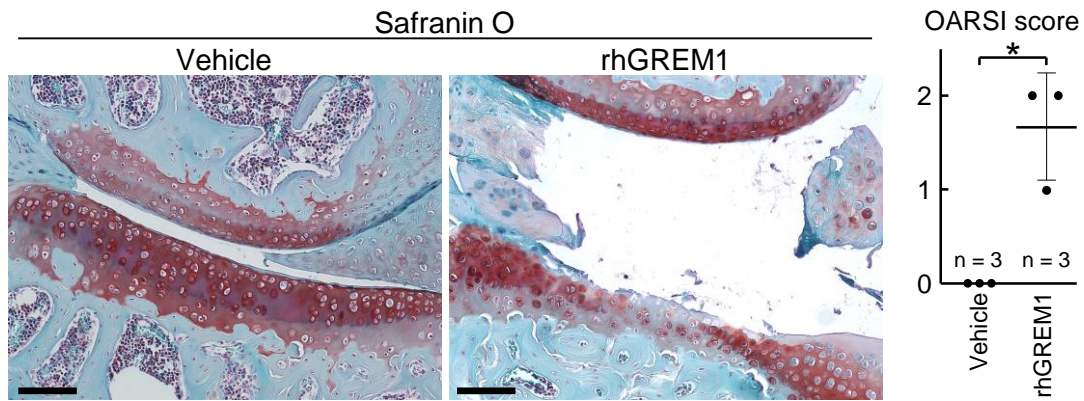

**Supplementary Figure 7** | Effects of recombinant human gremlin-1 (rhGREM1) on normal mouse articular cartilage. Safranin O staining and OARSI scores of mouse knee joints after intra-articular administration (twice a week for 8 weeks) of 10  $\mu$ L of 10  $\mu$ g/mL rhGREM1 or vehicle. Scale bars, 100  $\mu$ m. All error bars are expressed as means  $\pm$  SD of biologically independent three animals per group. \* $P < 0.05$  (Student's unpaired two-tailed t-test).

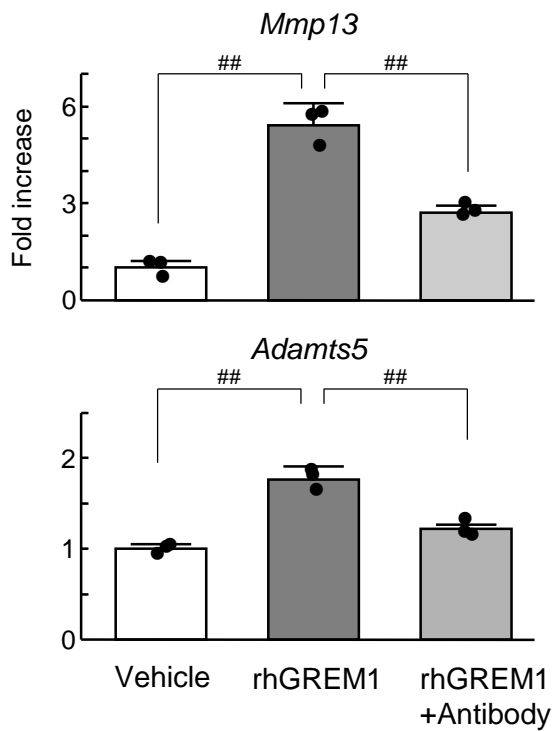

**Supplementary Figure 8** | mRNA levels of Mmp13 and Adamts5 in mouse primary chondrocytes treated with recombinant human gremlin-1(rhGREM1) and antibody against Gremlin-1. All error bars are expressed as means  $\pm$  SD of biologically independent three samples per group.  $##P < 0.001$  (one-way ANOVA test) .



16 weeks

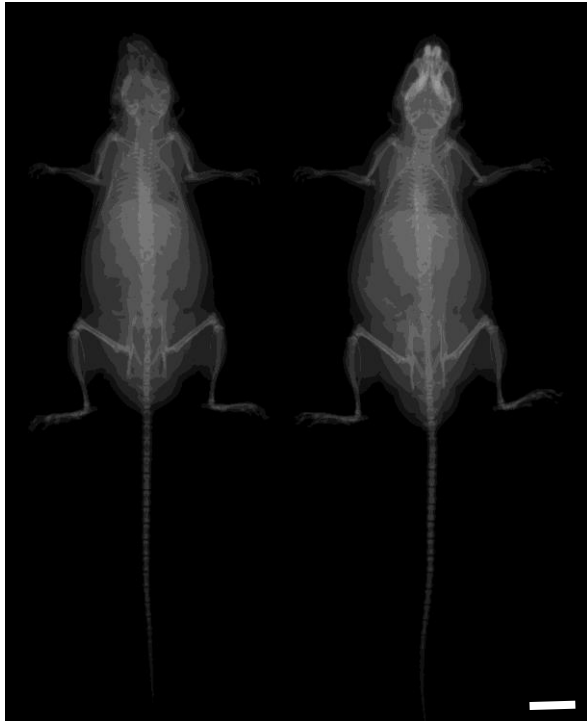

Cntl

cKO

18 months

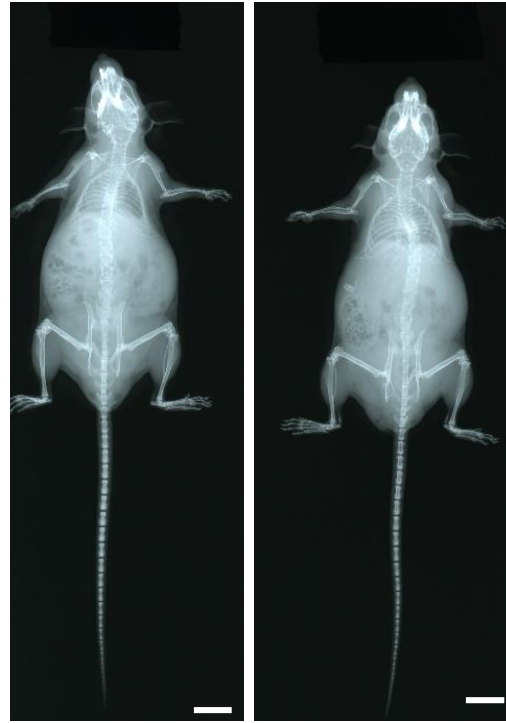

Cntl

cKO

**Supplementary Figure 9** | Plain radiograph of *Grem1<sup>fl/fl</sup>* (Cntl) and *Col2a1-Cre<sup>ERT2</sup>;Grem1<sup>fl/fl</sup>* (cKO) mice at 16 weeks , and 18 months of age. Scale bars, 1 cm.

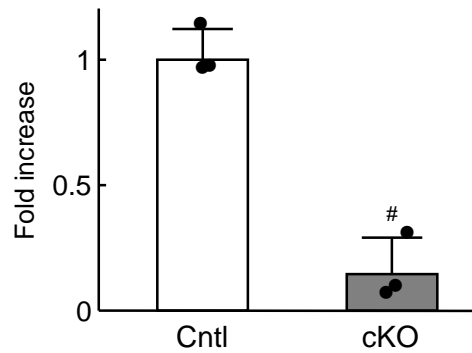

**Supplementary Figure 10** | mRNA levels of gremlin-1 in knee joint articular cartilage of *Grem1<sup>fl/fl</sup>* (Cntl) and *Col2a1-Cre<sup>ERT2</sup>;Grem1<sup>fl/fl</sup>* (cKO) mice at 16 weeks of age. Three mice were analysed for each group. Tamoxifen induction was performed at 7 weeks. All error bars are expressed as means  $\pm$  SD of biologically independent three animals per group # $P < 0.005$  (Student's unpaired two-tailed t-test) .

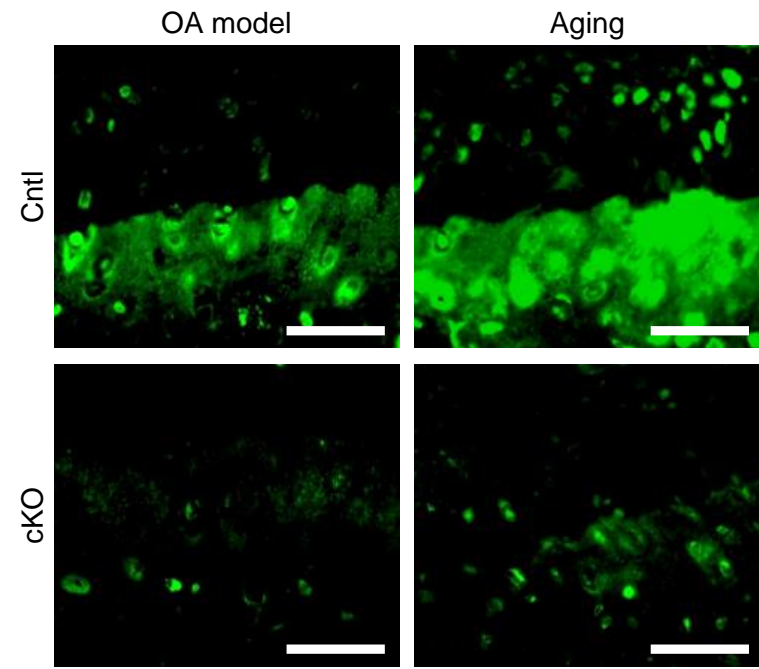

**Supplementary Figure 11** | Expression of gremlin-1 protein in mouse knee joints of *Grem1<sup>fl/fl</sup>* (Cntl) and *Col2a1-Cre<sup>ERT2</sup>;Grem1<sup>fl/fl</sup>* (cKO) mice 8 weeks after surgery (OA model), or at 18 months of age (Aging), confirmed by an antibody from a second manufacturer (R&D Systems). Tamoxifen induction was performed at 7 weeks. Scale bars, 50  $\mu$ m.

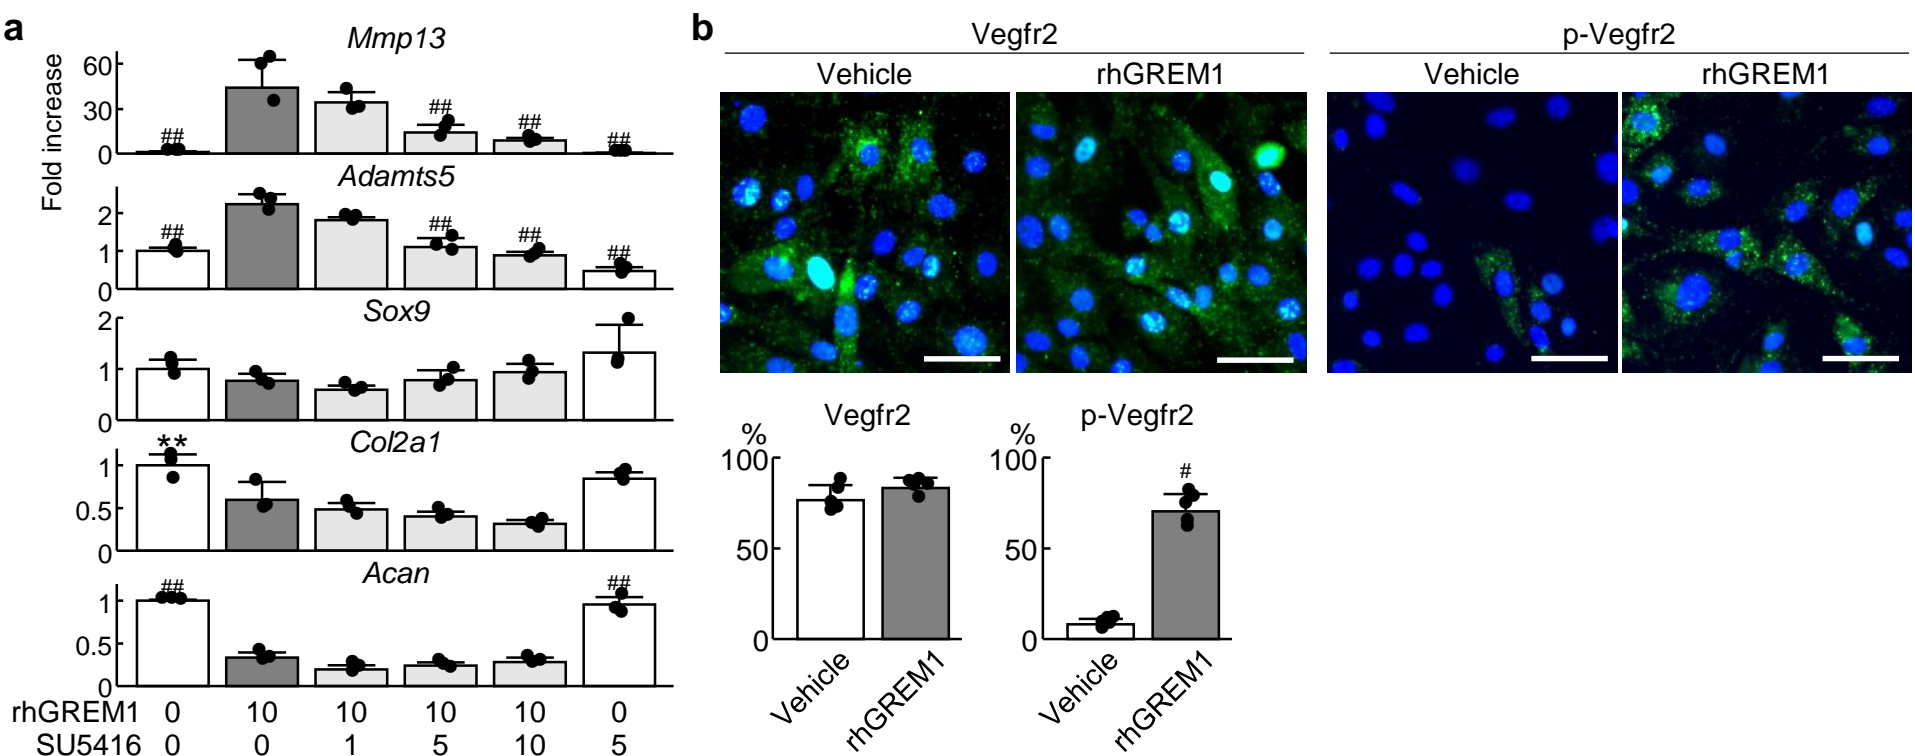

**Supplementary Figure 12** | Involvement of VEGFR2 in catabolic effects of gremlin-1 (a) mRNA levels of marker genes in mouse primary chondrocytes treated with or without rhGREM1 (10  $\mu\text{g}/\text{mL}$ ) and VEGFR2 inhibitor SU5416 (1-10  $\mu\text{M}$ ).  $n=3$  biologically independent samples.  $**P < 0.01$ ,  $###P < 0.001$  versus rhGREM1 without SU5416 (one-way ANOVA test). (b) Immunofluorescence and percentages of cells positive for VEGFR2 and p-VEGFR2 proteins in mouse primary chondrocytes cultured with or without 1  $\mu\text{g}/\text{mL}$  rhGREM1 for 10 minutes. Nuclei were stained with DAPI (blue). Scale bars, 50  $\mu\text{m}$ .  $N=5$  biologically independent experiments.  $\#P < 0.005$  versus vehicle (Student's unpaired two-tailed t-test). All error bars are expressed as mean  $\pm$  SD.

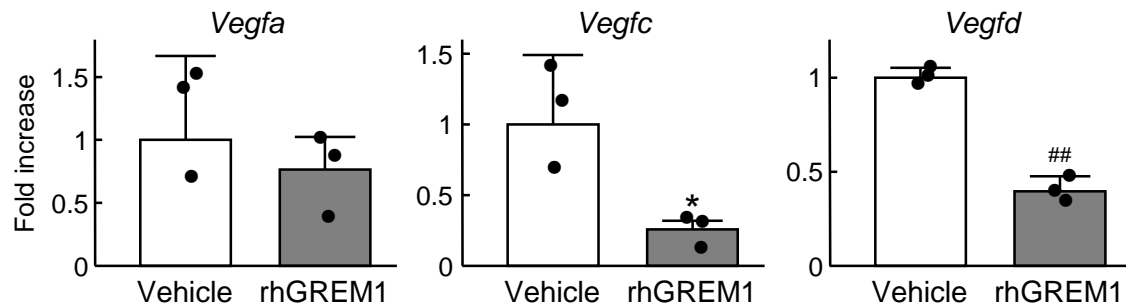

**Supplementary Figure 13** | mRNA levels of VEGF family members in mouse primary chondrocytes treated with recombinant human gremlin-1 (rhGREM1) or vehicle for 48 hours. All error bars are expressed as means  $\pm$  SD of biologically independent three samples per group. \* $P < 0.05$ , ## $P < 0.001$  (Student's unpaired two-tailed t-test) .

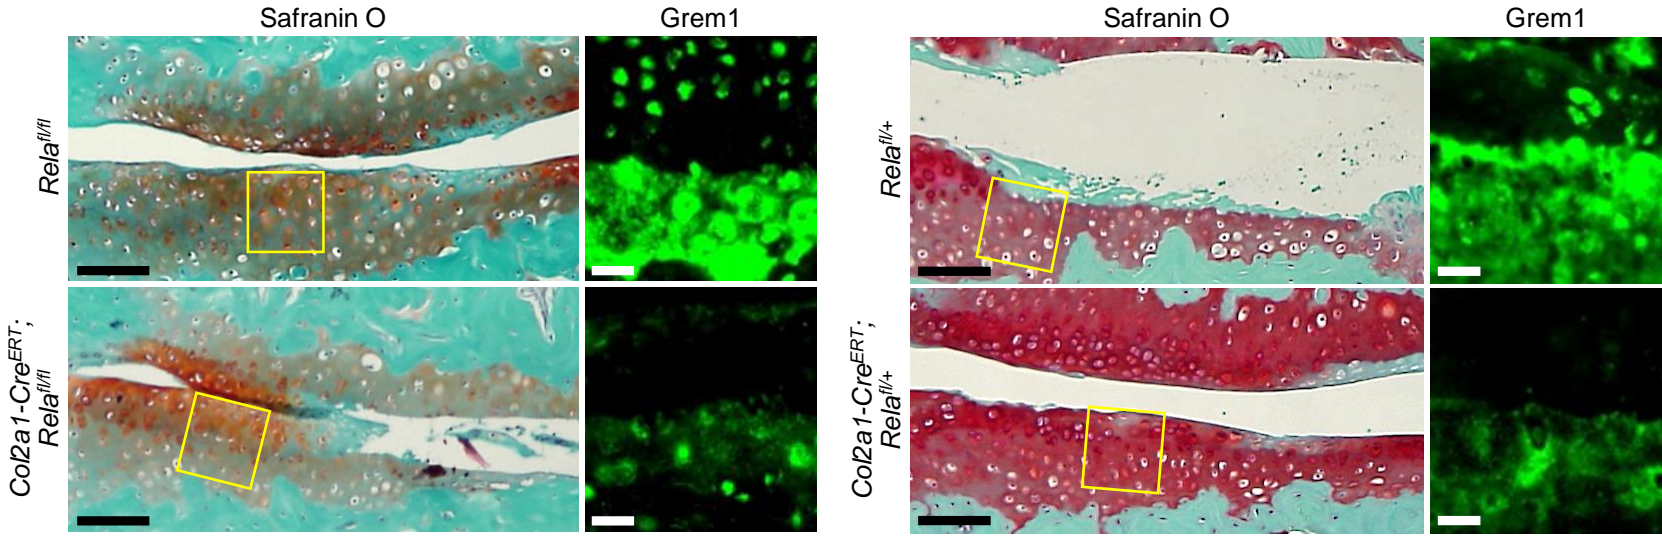

**Supplementary Figure 14** | Grem1 expression in articular cartilage of *Relα<sup>fl/fl</sup>*, *Col2a1-Cre<sup>ERT</sup>;Relα<sup>fl/fl</sup>*, *Relα<sup>fl/+</sup>*, and *Col2a1-Cre<sup>ERT</sup>;Relα<sup>fl/+</sup>* mice 8 weeks after OA induction. Inset boxes indicate the regions of immunofluorescence. Scale bars, 100 and 20 μm, respectively.

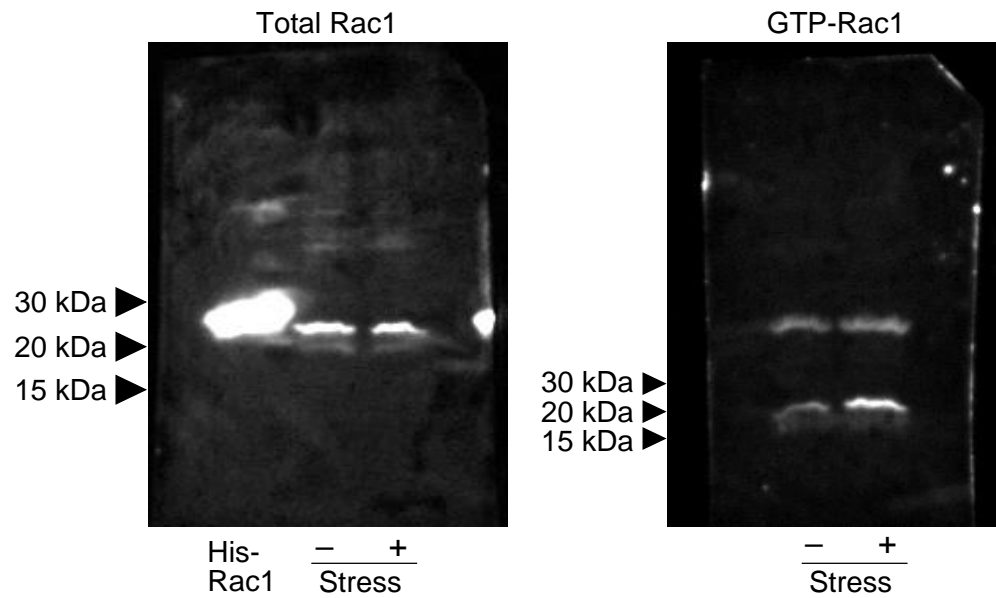

**Supplementary Figure 15** | Original images of immunoblots shown in Fig. 7c. His-tagged Rac1 (His-Rac1) was used for control.

| Gene Symbol     | Accession    | Signal intensity |               | Log2 Ratio  |
|-----------------|--------------|------------------|---------------|-------------|
|                 |              | before loading   | after loading |             |
| <i>Capn11</i>   | NM_001013767 | 9299.055269      | 53325.7646    | 2.519676687 |
| <i>Msmg</i>     | NM_001099314 | 7407.455253      | 38810.71353   | 2.389405046 |
| <i>Krtap8-2</i> | NM_010676    | 3469.265334      | 17042.34407   | 2.296421693 |
| <i>March9</i>   | NM_001033262 | 4571.987704      | 17082.54994   | 1.901629916 |
| <i>Grem1</i>    | NM_011824    | 5698.025738      | 16749.12464   | 1.555551655 |
| <i>Efemp1</i>   | NM_146015    | 6431.176527      | 15681.79843   | 1.285936426 |
| <i>Trpc2</i>    | NM_011644    | 4620.660478      | 10866.69348   | 1.233742033 |
| <i>Frzb</i>     | NM_011356    | 9014.812503      | 20010.49583   | 1.150387525 |
| <i>Tubb2b</i>   | NM_023716    | 17862.49242      | 39118.77646   | 1.130927848 |
| <i>Ogn</i>      | NM_008760    | 26155.23312      | 54398.34715   | 1.056463188 |
| <i>Lgals3bp</i> | NM_011150    | 6845.96582       | 14122.8949    | 1.044709847 |
| <i>Dcaf12l1</i> | NM_178739    | 4924.365956      | 10046.45043   | 1.028675979 |

**Supplementary Table 1** | List of abundantly expressing genes upregulated more than twice by cyclic tensile strain loading. Genes with signal intensity after loading  $\geq 10,000$  were shown.



| Gene Symbol      | Accession    | Signal intensity |               | Log2 Ratio   |
|------------------|--------------|------------------|---------------|--------------|
|                  |              | before loading   | after loading |              |
| <i>Cdca3</i>     | NM_013538    | 10502.7502       | 1932.064101   | -2.44255229  |
| <i>Ccnb2</i>     | NM_007630    | 10629.26583      | 2010.882243   | -2.402141447 |
| <i>Plk1</i>      | NM_011121    | 12939.87599      | 2829.856348   | -2.193023067 |
| <i>Cdc20</i>     | NM_023223    | 16180.12155      | 3670.30849    | -2.140249214 |
| <i>Birc5</i>     | NM_001012273 | 20131.94976      | 4742.967313   | -2.085625072 |
| <i>Cdca8</i>     | NM_026560    | 10556.36363      | 2551.777252   | -2.048538648 |
| <i>Col10a1</i>   | NM_009925    | 37809.16653      | 13367.92945   | -1.499960022 |
| <i>S100a4</i>    | NM_011311    | 37928.23417      | 13598.34897   | -1.479840707 |
| <i>Anxa8</i>     | NM_013473    | 44633.29228      | 16806.4497    | -1.409105235 |
| <i>S100a4</i>    | NM_011311    | 61894.92197      | 23460.04822   | -1.399615073 |
| <i>Spc25</i>     | NM_001199123 | 17662.13086      | 7151.440164   | -1.304353701 |
| <i>Stmn1</i>     | NM_019641    | 37199.01232      | 15659.03743   | -1.248268784 |
| <i>Slpi</i>      | NM_011414    | 11671.38066      | 4978.239164   | -1.229267788 |
| <i>Mt2</i>       | NM_008630    | 289979.607       | 124420.5658   | -1.220726474 |
| <i>Hist1h2bm</i> | NM_178200    | 25352.11135      | 11443.95537   | -1.147520124 |
| <i>D2Ert750e</i> | NM_026412    | 59395.60108      | 27927.09463   | -1.088690595 |
| <i>Hist1h2ba</i> | NM_175663    | 14721.8378       | 7012.534601   | -1.069949892 |
| <i>Hmgb2</i>     | NM_008252    | 18277.99952      | 8720.495652   | -1.067626138 |
| <i>Mfsd2b</i>    | NM_001033488 | 349494.0358      | 166924.5508   | -1.066071678 |
| <i>Stmn1</i>     | NM_019641    | 12581.30742      | 6031.354698   | -1.060727865 |
| <i>Hist1h2ag</i> | NM_178186    | 117049.5754      | 56354.92292   | -1.054506152 |
| <i>S100a6</i>    | NM_011313    | 224818.5125      | 109290.3577   | -1.040594716 |
| <i>Hist1h2ab</i> | NM_175660    | 19409.99793      | 9466.673736   | -1.035870458 |
| <i>Incenp</i>    | NM_016692    | 10455.74697      | 5226.357105   | -1.000418525 |

**Supplementary Table 2** | List of abundantly expressing genes downregulated more than twice by cyclic tensile strain loading. Genes with signal intensity before loading  $\geq 10,000$  were shown.

| Gene Symbol    | Accession    | Signal intensity |               | Log2 Ratio  |
|----------------|--------------|------------------|---------------|-------------|
|                |              | before loading   | after loading |             |
| <i>Grem1</i>   | NM_011824    | 5698.025738      | 16749.12464   | 1.555551655 |
| <i>Clu</i>     | NM_013492    | 19884.8569       | 36828.53628   | 0.889153879 |
| <i>Tspan6</i>  | NM_019656    | 43056.00086      | 60572.69499   | 0.492453276 |
| <i>Gstp1</i>   | NM_013541    | 7994.933624      | 11047.99402   | 0.466626483 |
| <i>S100b</i>   | NM_009115    | 108924.823       | 148680.8974   | 0.448886531 |
| <i>Gstp1</i>   | NM_013541    | 13734.66203      | 18432.17269   | 0.424404728 |
| <i>Slc44a2</i> | NM_152808    | 24591.25809      | 32459.21663   | 0.400482637 |
| <i>Hspb1</i>   | NM_013560    | 10850.31176      | 14208.69491   | 0.38903755  |
| <i>Prdx2</i>   | NM_011563    | 31153.23507      | 40689.33052   | 0.385268557 |
| <i>Shisa5</i>  | NM_025858    | 35668.36822      | 45684.58787   | 0.357062324 |
| <i>Ptplad1</i> | NM_021345    | 21919.26412      | 27062.23038   | 0.304081382 |
| <i>Traf3</i>   | NM_011632    | 9490.775175      | 11461.2271    | 0.272163683 |
| <i>Flna</i>    | NM_010227    | 55299.53406      | 66460.08773   | 0.265220873 |
| <i>Mib2</i>    | NM_001256107 | 13798.96856      | 16480.43276   | 0.256193694 |
| <i>Fbxw11</i>  | NM_134015    | 23505.87301      | 27996.04548   | 0.252201794 |
| <i>Prmt2</i>   | NM_001077638 | 10457.81841      | 12396.85821   | 0.245392614 |
| <i>Tlr9</i>    | NM_031178    | 11366.54549      | 13433.3369    | 0.241023863 |
| <i>Dab2ip</i>  | NM_001114125 | 10347.36042      | 12187.82273   | 0.236177633 |
| <i>Pink1</i>   | NM_026880    | 9232.91924       | 10848.95177   | 0.232696884 |
| <i>Fkbp1a</i>  | NM_008019    | 156737.4314      | 183032.5624   | 0.223750574 |

**Supplementary Table 3** | List of top 20 NF- $\kappa$ B-related genes upregulated by cyclic tensile strain loading. Genes with signal intensity after loading  $\geq 10,000$  were shown.

| Gene Symbol    | Accession    | Signal intensity |               | Log2 Ratio   |
|----------------|--------------|------------------|---------------|--------------|
|                |              | before loading   | after loading |              |
| <i>S100a4</i>  | NM_011311    | 37928.23417      | 13598.34897   | -1.479840707 |
| <i>Hmox1</i>   | NM_010442    | 37904.40065      | 24122.36805   | -0.651993812 |
| <i>Nup62</i>   | NM_053074    | 24734.81908      | 16256.28992   | -0.60554531  |
| <i>Ecm1</i>    | NM_007899    | 19558.0677       | 13999.76867   | -0.482360853 |
| <i>Npm1</i>    | NM_008722    | 166486.5224      | 128292.0788   | -0.375973295 |
| <i>Ndfip1</i>  | NM_022996    | 15024.6955       | 11901.28195   | -0.336218771 |
| <i>Siva1</i>   | NM_013929    | 16156.08808      | 13032.04294   | -0.310014654 |
| <i>Lgals1</i>  | NM_008495    | 76556.75807      | 61962.53392   | -0.305133594 |
| <i>Slc20a1</i> | NM_015747    | 30362.68988      | 24778.31843   | -0.293221324 |
| <i>Commd7</i>  | NM_001195390 | 14246.93684      | 12219.55867   | -0.221459585 |
| <i>Prdx1</i>   | NM_011034    | 48416.10442      | 42244.75456   | -0.196714788 |
| <i>Commd1</i>  | NM_144514    | 12011.47625      | 10806.53824   | -0.152509029 |
| <i>Litaf</i>   | NM_019980    | 12327.85029      | 11162.25455   | -0.143292794 |
| <i>Traf2</i>   | NM_009422    | 14829.6365       | 13587.03237   | -0.126252853 |
| <i>Rps3</i>    | NM_012052    | 173236.8482      | 159272.511    | -0.121248538 |
| <i>Psm6</i>    | NM_011968    | 21219.09437      | 19777.72847   | -0.101486345 |
| <i>Irak2</i>   | NM_172161    | 14387.37068      | 13882.18531   | -0.051568268 |
| <i>Rhoa</i>    | NM_016802    | 39887.70175      | 38727.06553   | -0.042601812 |
| <i>Arhgef2</i> | NM_001198911 | 32715.71052      | 32091.54059   | -0.027790554 |
| <i>Ndfip1</i>  | BC020359     | 47294.20926      | 46961.15776   | -0.010195573 |

**Supplementary Table 4** | List of top 20 NF- $\kappa$ B-related genes downregulated by cyclic tensile strain loading. Genes with signal intensity before loading  $\geq 10,000$  were shown.

| Gene Symbol    | Species |   | Sequence              |
|----------------|---------|---|-----------------------|
| <i>Gapdh</i>   | mouse   | F | tgaccaccaactgcttagc   |
|                |         | R | ggatgcagggatgatgttct  |
| <i>Mmp13</i>   | mouse   | F | aggccttcagaaaagccttc  |
|                |         | R | tcctggagtgatccagacc   |
| <i>Grem1</i>   | mouse   | F | tgagaggagggtgctgagt   |
|                |         | R | aacttctgggctgcagaa    |
| <i>Adamts5</i> | mouse   | F | gctactgcacaggggaagagg |
|                |         | R | tgcatgtttgggaaccatt   |
| <i>Sox9</i>    | mouse   | F | cgactacgctgaccatcaga  |
|                |         | R | agactggtgttcccagtg    |
| <i>Col2a1</i>  | mouse   | F | gccaagacctgaactctgc   |
|                |         | R | gcatagctgaagtggaagc   |
| <i>Acan</i>    | mouse   | F | ccaaccagcctgacaactt   |
|                |         | R | tctagcatgctccaccactg  |
| <i>Vegfa</i>   | mouse   | F | caggctgctgaacgatgaa   |
|                |         | R | tttctgcgcttctggtttt   |
| <i>Vegfc</i>   | mouse   | F | tttctgtgaggctcgtacc   |
|                |         | R | acgccagagacaagaagcac  |
| <i>Vegfd</i>   | mouse   | F | gtatggactcacgctcagca  |
|                |         | R | ctccacaccggaagacattt  |
| <i>RAC1</i>    | human   | F | aaccaatgcatttctctggag |
|                |         | R | tgtttgcggataggataggg  |

**Supplementary Table 5** | Primers used for qRT-PCR.
